# Supplementary material for: Chemical sensing with shapeshifting organic molecules
Source: Royal Society of Chemistry journal article supplement (doi:10.1039/c2sc20238g), 2012-01-01
Supplement: c2sc20238g.xlsx [file c2sc20238g.xlsx]

## Sheet: Sheet1
Template for pattern generation
ppm	Intensity
